# Supplementary material for: Development of a nano-QSAR model for predicting the toxicity of nano-metal oxide mixtures to Aliivibrio fischeri
Source: Royal Society of Chemistry journal article supplement (doi:10.1039/d2en00672c), 2022-12-22
Supplement: d2en00672c1.pdf [file d2en00672c1.pdf]

**Table S1. The regression models employed in describing the dose-response curves in this study**

| Regression model | Function                                                                           |
|------------------|------------------------------------------------------------------------------------|
| Gompertz         | $E(c) = \alpha \cdot \exp\left(-\exp\left(\frac{-c - \gamma}{\beta}\right)\right)$ |
| Hill             | $E(c) = \frac{\alpha}{1 + \left(\frac{\gamma}{c}\right)^\beta}$                    |
| Chapman          | $E(c) = \frac{\alpha}{1 + \left(\frac{\gamma}{c}\right)^\beta}$                    |

$E(c)$ : the fractional effect elicited at concentration  $c$ ;  $\alpha$ ,  $\beta$ , and  $\gamma$ : parameters of regression models (corresponding statistical estimates).

**Table S2. Toxicological Information of Single Nano Metal Oxide**

| No. | Chemical            | Engineered NPs size [nm] | $EC_{10}$ [mM]            | $EC_{50}$ [mM]               | RM <sup>a</sup> | Parameter  |           |            |
|-----|---------------------|--------------------------|---------------------------|------------------------------|-----------------|------------|-----------|------------|
|     |                     |                          |                           |                              |                 | $\alpha^b$ | $\beta^c$ | $\gamma^d$ |
| 1   | $SiO_2$             | 8                        | 19.673<br>(18.223-21.271) | N.A. <sup>e</sup>            | Hill            | 32.270     | 1.882     | 30110      |
| 2   | $SiO_2$ (Porous)    | 15-20                    | 35.078<br>(24.423-26.061) | N.A.                         | Hill            | 38.510     | 2.446     | 53.838     |
| 3   | $SiO_2$ (Spherical) | 15-20                    | 24.418<br>(31.829-38.715) | N.A.                         | Hill            | 42.122     | 1.974     | 44.105     |
| 4   | $SiO_2$             | 20-30                    | 64.131<br>(51.668-87.447) | N.A.                         | Hill            | 12.820     | 2.886     | 41.340     |
| 5   | $SiO_2$             | 60-70                    | 7.464<br>(7.417-7.932)    | 54.183<br>(54.172-54.394)    | Hill            | 154.400    | 0.976     | 115.200    |
| 6   | $TiO_2$ (Rutile)    | 30                       | 16.154<br>(15.784-16.516) | 318.642<br>(292.351-352.574) | Hill            | 54.580     | 1.303     | 50.860     |
| 7   | $TiO_2$ (Anatase)   | 15                       | 30.617<br>(30.416-31.075) | N.A.                         | Hill            | 14.150     | 0.112     | 10.380     |
| 8   | $TiO_2$ (Anatase)   | 18                       | 9.841<br>(9.786-9.902)    | 23.573<br>(23.298-23.854)    | Hill            | 102.400    | 2.492     | 24.020     |
| 9   | $TiO_2$ (Anatase)   | 30                       | 58.042<br>(48.910-62.533) | N.A.                         | Hill            | 48.690     | 8.991     | 67.73      |
| 10  | ZnO                 | 10-30                    | 0.021<br>(0.021-0.022)    | 0.039<br>(0.039-0.039)       | Hill            | 98.490     | 69.78     | 9.800      |
| 11  | ZnO                 | 35-45                    | 0.034<br>(0.033-0.034)    | 1.240<br>(1.189-1.295)       | Hill            | 71.550     | 4.289     | 0.412      |
| 12  | ZnO                 | 80-200                   | 0.022<br>(0.022-0.023)    | 0.079<br>(0.077-0.080)       | Hill            | 88.200     | 1.774     | 0.067      |

<sup>a</sup> Regression models; <sup>b</sup> Height; <sup>c</sup> Slope; <sup>d</sup> Center point, and <sup>e</sup> Not detectable.

**Table S3. Particle Characteristics of Binary Mixture Metal Oxide NPs**

| Mix No.<br><sup>a</sup> | Substance A |                   | Substance B       |             | Mixture Design    | Specific surface area [ $m^2/g$ ] | Hydrodynamic size in 2% NaCl [nm] <sup>b</sup> | Zeta-Potential <sup>d</sup> [mV] |
|-------------------------|-------------|-------------------|-------------------|-------------|-------------------|-----------------------------------|------------------------------------------------|----------------------------------|
|                         | Chemical A  | Size A [nm]       | Chemical B        | Size B [nm] |                   |                                   |                                                |                                  |
| 1                       | $SiO_2$     | 8                 | $TiO_2$ (Rutile)  | 30          | $EC_{10+}EC_{10}$ | 1238.5                            | 4613                                           | -3.33                            |
| 2                       | $SiO_2$     | 15-20 (porous)    | $TiO_2$ (Rutile)  | 30          | $EC_{10+}EC_{10}$ | 1848.8                            | 4135                                           | 1.03                             |
| 3                       | $SiO_2$     | 15-20 (spherical) | $TiO_2$ (Rutile)  | 30          | $EC_{10+}EC_{10}$ | 1412.4                            | 4411                                           | -5.23                            |
| 4                       | $SiO_2$     | 20-30             | $TiO_2$ (Rutile)  | 30          | $EC_{10+}EC_{10}$ | 3306.4                            | 1271                                           | 2.52                             |
| 5                       | $SiO_2$     | 60-70             | $TiO_2$ (Rutile)  | 30          | $EC_{10+}EC_{10}$ | 1073.2                            | 6001                                           | -5.70                            |
| 6                       | $SiO_2$     | 8                 | $TiO_2$ (Anatase) | 15          | $EC_{10+}EC_{10}$ | 2033.6                            | 4718                                           | -4.68                            |
| 7                       | $SiO_2$     | 15-20 (porous)    | $TiO_2$ (Anatase) | 15          | $EC_{10+}EC_{10}$ | 2320.0                            | 5670                                           | -7.16                            |
| 8                       | $SiO_2$     | 15-20 (spherical) | $TiO_2$ (Anatase) | 15          | $EC_{10+}EC_{10}$ | 2089.7                            | 5870                                           | -10.07                           |
| 9                       | $SiO_2$     | 20-30             | $TiO_2$ (Anatase) | 15          | $EC_{10+}EC_{10}$ | 3306.4                            | 7850                                           | -7.10                            |
| 10                      | $SiO_2$     | 60-70             | $TiO_2$ (Anatase) | 15          | $EC_{10+}EC_{10}$ | 2136.5                            | 6141                                           | -5.70                            |
| 11                      | $SiO_2$     | 8                 | $TiO_2$ (Anatase) | 18          | $EC_{10+}EC_{10}$ | 1025.4                            | 4920                                           | -1.39                            |
| 12                      | $SiO_2$     | 15-20 (porous)    | $TiO_2$ (Anatase) | 18          | $EC_{10+}EC_{10}$ | 1809.8                            | 4602                                           | -4.85                            |
| 13                      | $SiO_2$     | 15-20 (spherical) | $TiO_2$ (Anatase) | 18          | $EC_{10+}EC_{10}$ | 1267.8                            | 4772                                           | -8.32                            |
| 14                      | $SiO_2$     | 20-30             | $TiO_2$ (Anatase) | 18          | $EC_{10+}EC_{10}$ | 3331.3                            | 5614                                           | -7.52                            |
| 15                      | $SiO_2$     | 60-70             | $TiO_2$ (Anatase) | 18          | $EC_{10+}EC_{10}$ | 667.1                             | 4145                                           | -6.08                            |
| 16                      | $SiO_2$     | 8                 | $TiO_2$ (Anatase) | 30          | $EC_{10+}EC_{10}$ | 1409.9                            | 4142                                           | -3.78                            |
| 17                      | $SiO_2$     | 15-20 (porous)    | $TiO_2$ (Anatase) | 30          | $EC_{10+}EC_{10}$ | 1927.7                            | 5193                                           | -2.85                            |
| 18                      | $SiO_2$     | 15-20 (spherical) | $TiO_2$ (Anatase) | 30          | $EC_{10+}EC_{10}$ | 1549.0                            | 5130                                           | -1.54                            |
| 19                      | $SiO_2$     | 20-30             | $TiO_2$ (Anatase) | 30          | $EC_{10+}EC_{10}$ | 3192.0                            | 6406                                           | 1.85                             |
| 20                      | $SiO_2$     | 60-70             | $TiO_2$ (Anatase) | 30          | $EC_{10+}EC_{10}$ | 1330.5                            | 3743                                           | 2.47                             |

| Mix No.<br><sup>a</sup> | Substance A      |                   | Substance B                |             | Mixture Design                     | Specific surface area [ | Hydrodynamic size in 2% NaCl [nm] <sup>b</sup> | Zeta-Potential <sup>d</sup> [mV] |
|-------------------------|------------------|-------------------|----------------------------|-------------|------------------------------------|-------------------------|------------------------------------------------|----------------------------------|
|                         | Chemical A       | Size A [nm]       | Chemical B                 | Size B [nm] |                                    |                         |                                                |                                  |
| 21                      | SiO <sub>2</sub> | 8                 | ZnO                        | 10-30       | EC <sub>10+</sub> EC <sub>10</sub> | 1180.2                  | 751.5                                          | 1.70                             |
| 22                      | SiO <sub>2</sub> | 15-20 (porous)    | ZnO                        | 10-30       | EC <sub>10+</sub> EC <sub>10</sub> | 2177.7                  | 557.4                                          | -4.95                            |
| 23                      | SiO <sub>2</sub> | 15-20 (spherical) | ZnO                        | 10-30       | EC <sub>10+</sub> EC <sub>10</sub> | 1514.6                  | 1276                                           | -4.75                            |
| 24                      | SiO <sub>2</sub> | 20-30             | ZnO                        | 10-30       | EC <sub>10+</sub> EC <sub>10</sub> | 3851.2                  | 743.2                                          | -3.46                            |
| 25                      | SiO <sub>2</sub> | 60-70             | ZnO                        | 10-30       | EC <sub>10+</sub> EC <sub>10</sub> | 445.1                   | 669.2                                          | 4.47                             |
| 26                      | SiO <sub>2</sub> | 8                 | ZnO                        | 35-45       | EC <sub>10+</sub> EC <sub>10</sub> | 1180.2                  | 1361                                           | 4.39                             |
| 27                      | SiO <sub>2</sub> | 15-20 (porous)    | ZnO                        | 35-45       | EC <sub>10+</sub> EC <sub>10</sub> | 2177.7                  | 486.4                                          | 2.71                             |
| 28                      | SiO <sub>2</sub> | 15-20 (spherical) | ZnO                        | 35-45       | EC <sub>10+</sub> EC <sub>10</sub> | 1514.6                  | 648                                            | -0.80                            |
| 29                      | SiO <sub>2</sub> | 20-30             | ZnO                        | 35-45       | EC <sub>10+</sub> EC <sub>10</sub> | 3851.2                  | 1251                                           | -1.19                            |
| 30                      | SiO <sub>2</sub> | 60-70             | ZnO                        | 35-45       | EC <sub>10+</sub> EC <sub>10</sub> | 445.1                   | 877.8                                          | -0.07                            |
| 31                      | SiO <sub>2</sub> | 8                 | ZnO                        | 80-200      | EC <sub>10+</sub> EC <sub>10</sub> | 1180.2                  | 584.6                                          | -3.39                            |
| 32                      | SiO <sub>2</sub> | 15-20 (porous)    | ZnO                        | 80-200      | EC <sub>10+</sub> EC <sub>10</sub> | 2177.7                  | 473.6                                          | -3.95                            |
| 33                      | SiO <sub>2</sub> | 15-20 (spherical) | ZnO                        | 80-200      | EC <sub>10+</sub> EC <sub>10</sub> | 1514.6                  | 1181                                           | -4.55                            |
| 34                      | SiO <sub>2</sub> | 20-30             | ZnO                        | 80-200      | EC <sub>10+</sub> EC <sub>10</sub> | 3851.2                  | 704                                            | -4.78                            |
| 35                      | SiO <sub>2</sub> | 60-70             | ZnO                        | 80-200      | EC <sub>10+</sub> EC <sub>10</sub> | 445.1                   | 1047                                           | -3.76                            |
| 36                      | ZnO              | 10-30             | TiO <sub>2</sub> (Rutile)  | 30          | EC <sub>10+</sub> EC <sub>10</sub> | 1288.4                  | 1122                                           | -2.03                            |
| 37                      | ZnO              | 35-45             | TiO <sub>2</sub> (Rutile)  | 30          | EC <sub>10+</sub> EC <sub>10</sub> | 1290.0                  | 1123                                           | 1.55                             |
| 38                      | ZnO              | 80-200            | TiO <sub>2</sub> (Rutile)  | 30          | EC <sub>10+</sub> EC <sub>10</sub> | 1288.5                  | 881.3                                          | 1.82                             |
| 39                      | ZnO              | 10-30             | TiO <sub>2</sub> (Anatase) | 15          | EC <sub>10+</sub> EC <sub>10</sub> | 2443.4                  | 2120                                           | -2.08                            |
| 40                      | ZnO              | 35-45             | TiO <sub>2</sub> (Anatase) | 15          | EC <sub>10+</sub> EC <sub>10</sub> | 2445.1                  | 1094                                           | -12.33                           |
| 41                      | ZnO              | 80-200            | TiO <sub>2</sub> (Anatase) | 15          | EC <sub>10+</sub> EC <sub>10</sub> | 2443.5                  | 2326                                           | -12.60                           |
| 42                      | ZnO              | 10-30             | TiO <sub>2</sub> (Anatase) | 18          | EC <sub>10+</sub> EC <sub>10</sub> | 789.7                   | 2068                                           | -8.61                            |

| Mix No.<br><sup>a</sup> | Substance A                       |                   | Substance B                       |             | Mixture Design                                   | Specific surface area [ | Hydrodynamic size in 2% NaCl [nm] <sup>b</sup> | Zeta-Potential <sup>d</sup> [mV] |
|-------------------------|-----------------------------------|-------------------|-----------------------------------|-------------|--------------------------------------------------|-------------------------|------------------------------------------------|----------------------------------|
|                         | Chemical A                        | Size A [nm]       | Chemical B                        | Size B [nm] |                                                  |                         |                                                |                                  |
| 43                      | ZnO                               | 35-45             | <i>TiO</i> <sub>2</sub> (Anatase) | 18          | <i>EC</i> <sub>10+</sub> <i>EC</i> <sub>10</sub> | 791.3                   | 1421                                           | 2.07                             |
| 44                      | ZnO                               | 80-200            | <i>TiO</i> <sub>2</sub> (Anatase) | 18          | <i>EC</i> <sub>10+</sub> <i>EC</i> <sub>10</sub> | 789.8                   | 2103                                           | 0.79                             |
| 45                      | ZnO                               | 10-30             | <i>TiO</i> <sub>2</sub> (Anatase) | 30          | <i>EC</i> <sub>10+</sub> <i>EC</i> <sub>10</sub> | 1578.6                  | 1920                                           | -2.74                            |
| 46                      | ZnO                               | 35-45             | <i>TiO</i> <sub>2</sub> (Anatase) | 30          | <i>EC</i> <sub>10+</sub> <i>EC</i> <sub>10</sub> | 1580.4                  | 2652                                           | -3.12                            |
| 47                      | ZnO                               | 80-200            | <i>TiO</i> <sub>2</sub> (Anatase) | 30          | <i>EC</i> <sub>10+</sub> <i>EC</i> <sub>10</sub> | 1580.4                  | 1373                                           | 2.50                             |
| 48                      | <i>TiO</i> <sub>2</sub> (Rutile)  | 30                | <i>SiO</i> <sub>2</sub>           | 60-70       | <i>EC</i> <sub>10+</sub> <i>EC</i> <sub>10</sub> | 1073.2                  | 4757                                           | 2.72                             |
| 49                      | <i>TiO</i> <sub>2</sub> (Anatase) | 15                | <i>SiO</i> <sub>2</sub>           | 60-70       | <i>EC</i> <sub>10+</sub> <i>EC</i> <sub>50</sub> | 2136.5                  | 6706                                           | 0.69                             |
| 50                      | <i>TiO</i> <sub>2</sub> (Anatase) | 18                | <i>SiO</i> <sub>2</sub>           | 60-70       | <i>EC</i> <sub>10+</sub> <i>EC</i> <sub>50</sub> | 667.1                   | 5858                                           | -6.94                            |
| 51                      | <i>TiO</i> <sub>2</sub> (Anatase) | 30                | <i>SiO</i> <sub>2</sub>           | 60-70       | <i>EC</i> <sub>10+</sub> <i>EC</i> <sub>50</sub> | 1330.5                  | 5537                                           | -1.97                            |
| 52                      | ZnO                               | 10-30             | <i>SiO</i> <sub>2</sub>           | 60-70       | <i>EC</i> <sub>10+</sub> <i>EC</i> <sub>50</sub> | 445.1                   | 1470                                           | -1.34                            |
| 53                      | ZnO                               | 35-45             | <i>SiO</i> <sub>2</sub>           | 60-70       | <i>EC</i> <sub>10+</sub> <i>EC</i> <sub>50</sub> | 446.7                   | 1749                                           | -0.81                            |
| 54                      | ZnO                               | 80-200            | <i>SiO</i> <sub>2</sub>           | 60-70       | <i>EC</i> <sub>10+</sub> <i>EC</i> <sub>50</sub> | 445.2                   | 1546                                           | -1.94                            |
| 55                      | <i>SiO</i> <sub>2</sub>           | 8                 | <i>TiO</i> <sub>2</sub> (Anatase) | 18          | <i>EC</i> <sub>10+</sub> <i>EC</i> <sub>50</sub> | 1025.4                  | 8070                                           | -2.96                            |
| 56                      | <i>SiO</i> <sub>2</sub>           | 15-20 (porous)    | <i>TiO</i> <sub>2</sub> (Anatase) | 18          | <i>EC</i> <sub>10+</sub> <i>EC</i> <sub>50</sub> | 1809.8                  | 6265                                           | -0.99                            |
| 57                      | <i>SiO</i> <sub>2</sub>           | 15-20 (spherical) | <i>TiO</i> <sub>2</sub> (Anatase) | 18          | <i>EC</i> <sub>10+</sub> <i>EC</i> <sub>50</sub> | 1267.8                  | 5991                                           | -3.20                            |
| 58                      | <i>SiO</i> <sub>2</sub>           | 20-30             | <i>TiO</i> <sub>2</sub> (Anatase) | 18          | <i>EC</i> <sub>10+</sub> <i>EC</i> <sub>50</sub> | 3331.3                  | 7403                                           | 0.22                             |
| 59                      | <i>SiO</i> <sub>2</sub>           | 60-70             | <i>TiO</i> <sub>2</sub> (Anatase) | 18          | <i>EC</i> <sub>10+</sub> <i>EC</i> <sub>50</sub> | 667.1                   | 4061                                           | -1.80                            |
| 60                      | ZnO                               | 10-30             | <i>TiO</i> <sub>2</sub> (Anatase) | 18          | <i>EC</i> <sub>10+</sub> <i>EC</i> <sub>50</sub> | 789.7                   | 3442                                           | -2.69                            |
| 61                      | ZnO                               | 35-45             | <i>TiO</i> <sub>2</sub> (Anatase) | 18          | <i>EC</i> <sub>10+</sub> <i>EC</i> <sub>50</sub> | 791.3                   | 4557                                           | -4.68                            |
| 62                      | ZnO                               | 80-200            | <i>TiO</i> <sub>2</sub> (Anatase) | 18          | <i>EC</i> <sub>10+</sub> <i>EC</i> <sub>50</sub> | 789.8                   | 4134                                           | -4.46                            |
| 63                      | <i>TiO</i> <sub>2</sub> (Anatase) | 15                | ZnO                               | 10-30       | <i>EC</i> <sub>10+</sub> <i>EC</i> <sub>50</sub> | 2443.4                  | 3616                                           | -5.07                            |
| 64                      | <i>TiO</i> <sub>2</sub> (Anatase) | 18                | ZnO                               | 10-30       | <i>EC</i> <sub>10+</sub> <i>EC</i> <sub>50</sub> | 789.7                   | 3920                                           | -5.16                            |

| Mix No.<br><sup>a</sup> | Substance A                       |                   | Substance B |             | Mixture Design                                   | Specific surface area [ | Hydrodynamic size in 2% NaCl [nm] <sup>b</sup> | Zeta-Potential <sup>d</sup> [mV] |
|-------------------------|-----------------------------------|-------------------|-------------|-------------|--------------------------------------------------|-------------------------|------------------------------------------------|----------------------------------|
|                         | Chemical A                        | Size A [nm]       | Chemical B  | Size B [nm] |                                                  |                         |                                                |                                  |
| 65                      | <i>TiO</i> <sub>2</sub> (Anatase) | 30                | ZnO         | 10-30       | <i>EC</i> <sub>10+</sub> <i>EC</i> <sub>50</sub> | 1578.5                  | 3020                                           | -5.26                            |
| 66                      | <i>SiO</i> <sub>2</sub>           | 8                 | ZnO         | 10-30       | <i>EC</i> <sub>10+</sub> <i>EC</i> <sub>50</sub> | 1180.2                  | 745.9                                          | -5.14                            |
| 67                      | <i>SiO</i> <sub>2</sub>           | 15-20 (porous)    | ZnO         | 10-30       | <i>EC</i> <sub>10+</sub> <i>EC</i> <sub>50</sub> | 2177.7                  | 441.1                                          | -5.93                            |
| 68                      | <i>SiO</i> <sub>2</sub>           | 15-20 (spherical) | ZnO         | 10-30       | <i>EC</i> <sub>10+</sub> <i>EC</i> <sub>50</sub> | 1514.6                  | 597                                            | -5.95                            |
| 69                      | <i>SiO</i> <sub>2</sub>           | 20-30             | ZnO         | 10-30       | <i>EC</i> <sub>10+</sub> <i>EC</i> <sub>50</sub> | 3851.2                  | 528.7                                          | -5.58                            |
| 70                      | <i>SiO</i> <sub>2</sub>           | 60-70             | ZnO         | 10-30       | <i>EC</i> <sub>10+</sub> <i>EC</i> <sub>50</sub> | 445.1                   | 1724                                           | -5.16                            |
| 71                      | <i>TiO</i> <sub>2</sub> (Anatase) | 15                | ZnO         | 35-45       | <i>EC</i> <sub>10+</sub> <i>EC</i> <sub>50</sub> | 2445.1                  | 9255                                           | -6.87                            |
| 72                      | <i>TiO</i> <sub>2</sub> (Anatase) | 18                | ZnO         | 35-45       | <i>EC</i> <sub>10+</sub> <i>EC</i> <sub>50</sub> | 791.3                   | 3568                                           | -7.44                            |
| 73                      | <i>TiO</i> <sub>2</sub> (Anatase) | 30                | ZnO         | 35-45       | <i>EC</i> <sub>10+</sub> <i>EC</i> <sub>50</sub> | 1580.2                  | 3306                                           | -7.22                            |
| 74                      | <i>SiO</i> <sub>2</sub>           | 8                 | ZnO         | 35-45       | <i>EC</i> <sub>10+</sub> <i>EC</i> <sub>50</sub> | 1181.9                  | 597.9                                          | -5.51                            |
| 75                      | <i>SiO</i> <sub>2</sub>           | 15-20 (porous)    | ZnO         | 35-45       | <i>EC</i> <sub>10+</sub> <i>EC</i> <sub>50</sub> | 1180.3                  | 466.7                                          | -5.25                            |
| 76                      | <i>SiO</i> <sub>2</sub>           | 15-20 (spherical) | ZnO         | 35-45       | <i>EC</i> <sub>10+</sub> <i>EC</i> <sub>50</sub> | 1182.1                  | 797.7                                          | -6.32                            |
| 77                      | <i>SiO</i> <sub>2</sub>           | 20-30             | ZnO         | 35-45       | <i>EC</i> <sub>10+</sub> <i>EC</i> <sub>50</sub> | 1182.1                  | 648.1                                          | -5.51                            |
| 78                      | <i>SiO</i> <sub>2</sub>           | 60-70             | ZnO         | 35-45       | <i>EC</i> <sub>10+</sub> <i>EC</i> <sub>50</sub> | 1182.1                  | 2226                                           | -5.07                            |
| 79                      | <i>TiO</i> <sub>2</sub> (Anatase) | 15                | ZnO         | 80-200      | <i>EC</i> <sub>10+</sub> <i>EC</i> <sub>50</sub> | 2443.5                  | 3908                                           | -4.22                            |
| 80                      | <i>TiO</i> <sub>2</sub> (Anatase) | 18                | ZnO         | 80-200      | <i>EC</i> <sub>50+</sub> <i>EC</i> <sub>50</sub> | 789.8                   | 5231                                           | -4.62                            |
| 81                      | <i>TiO</i> <sub>2</sub> (Anatase) | 30                | ZnO         | 80-200      | <i>EC</i> <sub>50+</sub> <i>EC</i> <sub>50</sub> | 1578.6                  | 5824                                           | -4.71                            |
| 82                      | <i>SiO</i> <sub>2</sub>           | 8                 | ZnO         | 80-200      | <i>EC</i> <sub>50+</sub> <i>EC</i> <sub>50</sub> | 1180.3                  | 747.4                                          | -4.90                            |
| 83                      | <i>SiO</i> <sub>2</sub>           | 15-20 (porous)    | ZnO         | 80-200      | <i>EC</i> <sub>50+</sub> <i>EC</i> <sub>50</sub> | 2177.8                  | 453.7                                          | -4.92                            |
| 84                      | <i>SiO</i> <sub>2</sub>           | 15-20 (spherical) | ZnO         | 80-200      | <i>EC</i> <sub>50+</sub> <i>EC</i> <sub>50</sub> | 1514.7                  | 734.7                                          | -4.83                            |
| 85                      | <i>SiO</i> <sub>2</sub>           | 20-30             | ZnO         | 80-200      | <i>EC</i> <sub>50+</sub> <i>EC</i> <sub>50</sub> | 3851.3                  | 688.7                                          | -4.77                            |
| 86                      | <i>SiO</i> <sub>2</sub>           | 60-70             | ZnO         | 80-200      | <i>EC</i> <sub>50+</sub> <i>EC</i> <sub>50</sub> | 445.2                   | 1616                                           | -4.81                            |

| Mix No.<br><sup>a</sup> | Substance A                       |             | Substance B                       |             | Mixture Design                                   | Specific surface area [ | Hydrodynamic size in 2% NaCl [nm] <sup>b</sup> | Zeta-Potential <sup>d</sup> [mV] |
|-------------------------|-----------------------------------|-------------|-----------------------------------|-------------|--------------------------------------------------|-------------------------|------------------------------------------------|----------------------------------|
|                         | Chemical A                        | Size A [nm] | Chemical B                        | Size B [nm] |                                                  |                         |                                                |                                  |
| 87                      | <i>SiO</i> <sub>2</sub>           | 60-70       | <i>TiO</i> <sub>2</sub> (Anatase) | 18          | <i>EC</i> <sub>50+</sub> <i>EC</i> <sub>50</sub> | 667.1                   | 7389                                           | -4.59                            |
| 88                      | <i>SiO</i> <sub>2</sub>           | 60-70       | ZnO                               | 10-30       | <i>EC</i> <sub>50+</sub> <i>EC</i> <sub>50</sub> | 445.1                   | 1663                                           | -4.56                            |
| 89                      | <i>SiO</i> <sub>2</sub>           | 60-70       | ZnO                               | 35-45       | <i>EC</i> <sub>50+</sub> <i>EC</i> <sub>50</sub> | 446.7                   | 1701                                           | -5.25                            |
| 90                      | <i>SiO</i> <sub>2</sub>           | 60-70       | ZnO                               | 80-200      | <i>EC</i> <sub>50+</sub> <i>EC</i> <sub>50</sub> | 445.2                   | 1136                                           | -6.73                            |
| 91                      | <i>TiO</i> <sub>2</sub> (Anatase) | 18          | ZnO                               | 10-30       | <i>EC</i> <sub>50+</sub> <i>EC</i> <sub>50</sub> | 1288.4                  | 2669                                           | -7.91                            |
| 92                      | <i>TiO</i> <sub>2</sub> (Anatase) | 18          | ZnO                               | 35-45       | <i>EC</i> <sub>50+</sub> <i>EC</i> <sub>50</sub> | 1290.0                  | 5759                                           | -7.52                            |
| 93                      | <i>TiO</i> <sub>2</sub> (Anatase) | 18          | ZnO                               | 80-200      | <i>EC</i> <sub>50+</sub> <i>EC</i> <sub>50</sub> | 1288.5                  | 2879                                           | -6.03                            |

<sup>a</sup> Denomination of binary mixture. <sup>b</sup> All DLS measurements were performed in triplicate. <sup>c</sup> Polydispersity index (Pdl), a size distribution parameter derived from the coefficient of the correlation function.

**Table S4. Binary Mixture Designs and Parameters of Regression Models for Dose-response Curves of Binary Mixtures of Nano Metal Oxide**

| Mix No. | RM <sup>a</sup> | $r^2$ | Parameter             |                      |                       | Concentration Addition (CA) model |                          |                  |                   |                         |                          |      |      |
|---------|-----------------|-------|-----------------------|----------------------|-----------------------|-----------------------------------|--------------------------|------------------|-------------------|-------------------------|--------------------------|------|------|
|         |                 |       |                       |                      |                       | $EC_{10}$ Ratio                   |                          |                  |                   | $EC_{50}$ Ratio         |                          |      |      |
|         |                 |       | $\alpha$ <sup>b</sup> | $\beta$ <sup>c</sup> | $\gamma$ <sup>d</sup> | Observed $EC_{10}$ [mM]           | Predicted $EC_{10}$ [mM] | MDR <sup>a</sup> | Type <sup>b</sup> | Observed $EC_{50}$ [mM] | Predicted $EC_{50}$ [mM] | MDR  | Type |
| 1       | Hill            | 0.987 | 41.240                | 1.038                | 32.070                | 10.700<br>(9.901-11.512)          | 18.086                   | 1.690            | Add               | n.a. <sup>l</sup>       | n.a.                     | n.a. | n.a. |
| 2       | Hill            | 0.976 | 38.220                | 1.487                | 25.660                | 12.768<br>(12.494-13.026)         | 29.247                   | 2.291            | Ant <sup>f</sup>  | n.a.                    | n.a.                     | n.a. | n.a. |
| 3       | Hill            | 0.927 | 37.590                | 1.317                | 25.650                | 11.869<br>(11.276-12.493)         | 21.193                   | 1.786            | Add               | n.a.                    | n.a.                     | n.a. | n.a. |
| 4       | Hill            | 0.958 | 49.390                | 1.549                | 32.170                | 13.276<br>(12.904-13.654)         | 54.621                   | 4.114            | Ant               | n.a.                    | n.a.                     | n.a. | n.a. |
| 5       | Hill            | 0.907 | 23.040                | 4.375                | 12.850                | 12.089<br>(11.875-12.314)         | 13.414                   | 1.110            | Add               | n.a.                    | n.a.                     | n.a. | n.a. |
| 6       | n.a.            | n.a.  | n.a.                  | n.a.                 | n.a.                  | n.a.                              | n.a.                     | n.a.             | n.a.              | n.a.                    | n.a.                     | n.a. | n.a. |
| 7       | n.a.            | n.a.  | n.a.                  | n.a.                 | n.a.                  | n.a.                              | n.a.                     | n.a.             | n.a.              | n.a.                    | n.a.                     | n.a. | n.a. |
| 8       | n.a.            | n.a.  | n.a.                  | n.a.                 | n.a.                  | n.a.                              | n.a.                     | n.a.             | n.a.              | n.a.                    | n.a.                     | n.a. | n.a. |
| 9       | Hill            | 0.912 | 15.500                | 3.957                | 37.790                | 43.954<br>(41.631-46.313)         | 23.210                   | 0.528            | Add               | n.a.                    | n.a.                     | n.a. | n.a. |
| 10      | n.a.            | n.a.  | n.a.                  | n.a.                 | n.a.                  | n.a.                              | n.a.                     | n.a.             | n.a.              | n.a.                    | n.a.                     | n.a. | n.a. |
| 11      | Hill            | 0.813 | 21.680                | 58.790               | 13.650                | 13.617<br>(13.559-13.682)         | 16.379                   | 1.203            | Add               | n.a.                    | n.a.                     | n.a. | n.a. |
| 12      | Hill            | 0.973 | 43.590                | 2.440                | 28.670                | 17.449<br>(16.114-18.798)         | 29.663                   | 1.700            | Add               | n.a.                    | n.a.                     | n.a. | n.a. |
| 13      | Hill            | 0.954 | 30.380                | 3.662                | 19.550                | 16.094<br>(15.895-16.293)         | 20.308                   | 1.262            | Add               | n.a.                    | n.a.                     | n.a. | n.a. |
| 14      | Hill            | 0.948 | 28.040                | 3.972                | 37.180                | 32.050<br>(31.370-                | 56.864                   | 1.774            | Add               | n.a.                    | n.a.                     | n.a. | n.a. |





| Mix No. | RM <sup>a</sup> | Concentration Addition (CA) model |                          |                         |                          |                                                                    |                                          |                  |                   |                                                                    |                                          |       |      |
|---------|-----------------|-----------------------------------|--------------------------|-------------------------|--------------------------|--------------------------------------------------------------------|------------------------------------------|------------------|-------------------|--------------------------------------------------------------------|------------------------------------------|-------|------|
|         |                 | Parameter                         |                          |                         |                          | <i>EC</i> <sub>10</sub> Ratio                                      |                                          |                  |                   | <i>EC</i> <sub>50</sub> Ratio                                      |                                          |       |      |
|         |                 | <i>r</i> <sup>2</sup>             | <sup>b</sup><br>$\alpha$ | <sup>c</sup><br>$\beta$ | <sup>d</sup><br>$\gamma$ | Observed<br><i>EC</i> <sub>10</sub><br>[ <i>EC</i> <sub>10</sub> ] | Predicted<br>[ <i>EC</i> <sub>10</sub> ] | MDR <sup>a</sup> | Type <sup>b</sup> | Observed<br><i>EC</i> <sub>50</sub><br>[ <i>EC</i> <sub>50</sub> ] | Predicted<br>[ <i>EC</i> <sub>50</sub> ] | MDR   | Type |
| 31      | n.a.            | n.a.                              | n.a.                     | n.a.                    | n.a.                     | n.a.                                                               | n.a.                                     | n.a.             | n.a.              | n.a.                                                               | n.a.                                     | n.a.  | n.a. |
| 32      | Hill            | 0.945                             | 41.330                   | 1.492                   | 11.950                   | 5.559<br>(5.202-5.950)                                             | 35.058                                   | 6.307            | Ant               | n.a.                                                               | n.a.                                     | n.a.  | n.a. |
| 33      | Hill            | 0.907                             | 37.700                   | 1.445                   | 10.160                   | 5.017<br>(4.813-5.242)                                             | 24.404                                   | 4.865            | Ant               | n.a.                                                               | n.a.                                     | n.a.  | n.a. |
| 34      | Hill            | 0.956                             | 108.900                  | 1.505                   | 75.950                   | 16.561<br>(16.199-16.917)                                          | 64.110                                   | 3.871            | Ant               | 68.124<br>(65.801-71.038)                                          | 64.110                                   | 0.941 | Add  |
| 35      | Hill            | 0.849                             | 31.170                   | 2.043                   | 3.790                    | 2.626<br>(2.560-2.694)                                             | 7.443                                    | 2.835            | Ant               | n.a.                                                               | n.a.                                     | n.a.  | n.a. |
| 36      | Hill            | 0.995                             | 90.280                   | 2.543                   | 5.204                    | 2.294<br>(2.271-2.318)                                             | 16.131                                   | 7.030            | Ant               | 5.666<br>(5.634-5.697)                                             | 16.131                                   | 2.847 | Syn  |
| 37      | Hill            | 0.995                             | 88.140                   | 2.767                   | 4.745                    | 2.257<br>(2.199-2.316)                                             | 16.131                                   | 7.146            | Ant               | 5.233<br>(5.149-5.319)                                             | 16.131                                   | 3.082 | Syn  |
| 38      | Hill            | 0.993                             | 88.150                   | 2.905                   | 4.925                    | 2.427<br>(2.400-2.455)                                             | 16.132                                   | 6.647            | Ant               | 5.406<br>(5.341-5.471)                                             | 16.132                                   | 2.984 | Syn  |
| 39      | Hill            | 0.994                             | 90.420                   | 2.091                   | 7.000                    | 2.583<br>(2.500-2.671)                                             | 30.594                                   | 11.844           | Ant               | 7.749<br>(7.539-7.965)                                             | 30.594                                   | 3.948 | Syn  |
| 40      | Hill            | 0.994                             | 88.580                   | 2.537                   | 5.272                    | 2.339<br>(2.327-2.352)                                             | 30.615                                   | 13.088           | Ant               | 5.840<br>(5.776-5.905)                                             | 30.615                                   | 5.242 | Syn  |
| 41      | Gompertz        | 0.996                             | 91.160                   | 4.178                   | 3.781                    | 0.467<br>(0.438-0.503)                                             | 30.595                                   | 65.485           | Ant               | 5.911<br>(5.671-6.160)                                             | 30.595                                   | 5.176 | Syn  |
| 42      | Chapman         | 0.983                             | 25670                    | 0.000                   | 0.671                    | 0.501<br>(0.499-0.503)                                             | 9.818                                    | 6.450            | Ant               | 5.521<br>(5.342-5.700)                                             | 9.818                                    | 2.470 | Syn  |
| 43      | Hill            | 0.984                             | 111.600                  | 2.076                   | 6.021                    | 1.971<br>(1.834-2.113)                                             | 9.839                                    | 4.993            | Ant               | 5.445<br>(5.362-5.521)                                             | 9.839                                    | 1.807 | Add  |
| 44      | Hill            | 0.992                             | 106.800                  | 1.848                   | 8.237                    | 2.412<br>(2.370-2.451)                                             | 9.819                                    | 4.072            | Ant               | 7.689<br>(7.677-7.702)                                             | 9.819                                    | 1.277 | Add  |
| 45      | Hill            | 0.992                             | 91.390                   | 2.106                   | 8.329                    | 3.078<br>(2.972-3.188)                                             | 58.019                                   | 18.849           | Ant               | 9.111<br>(8.876-9.351)                                             | 58.019                                   | 6.368 | Syn  |
| 46      | Hill            | 0.991                             | 87.470                   | 2.479                   | 6.109                    | 2.675<br>(2.637-2.714)                                             | 58.019                                   | 21.691           | Ant               | 6.864<br>(6.751-6.980)                                             | 58.019                                   | 8.453 | Syn  |
| 47      | Hill            | 0.985                             | 86.995                   | 2.331                   | 7.938                    | 3.307<br>(3.179-3.441)                                             | 58.021                                   | 17.544           | Ant               | 9.034<br>(8.744-9.333)                                             | 58.021                                   | 6.423 | Syn  |
| 48      | Hill            | 0.883                             | 34.840                   | 3.034                   | 35.480                   | 26.286<br>(25.780-26.792)                                          | 9.466                                    | 0.360            | Ant               | n.a.                                                               | n.a.                                     | n.a.  | n.a. |

| Mix No. | RM <sup>a</sup> | Concentration Addition (CA) model |                          |                          |                          |                                         |                                          |                  |                   |                                         |                                          |       |      |
|---------|-----------------|-----------------------------------|--------------------------|--------------------------|--------------------------|-----------------------------------------|------------------------------------------|------------------|-------------------|-----------------------------------------|------------------------------------------|-------|------|
|         |                 | Parameter                         |                          |                          |                          | <i>EC</i> <sub>10</sub> Ratio           |                                          |                  |                   | <i>EC</i> <sub>50</sub> Ratio           |                                          |       |      |
|         |                 | <i>r</i> <sup>2</sup>             | <sup>b</sup><br><i>α</i> | <sup>c</sup><br><i>β</i> | <sup>d</sup><br><i>γ</i> | Observed<br><i>EC</i> <sub>10</sub> [b] | Predicted<br>[ <i>EC</i> <sub>10</sub> ] | MDR <sup>a</sup> | Type <sup>b</sup> | Observed<br><i>EC</i> <sub>50</sub> [c] | Predicted<br>[ <i>EC</i> <sub>50</sub> ] | MDR   | Type |
| 49      | Hill            | 0.749                             | 19.050                   | 2.488                    | 33.320                   | 34.690<br>(31.142-38.144)               | 15.843                                   | 0.457            | Ant               | n.a.                                    | n.a.                                     | n.a.  | n.a. |
| 50      | Hill            | 0.942                             | 40.750                   | 2.459                    | 33.190                   | 21.018<br>(20.799-21.241)               | 7.833                                    | 0.373            | Ant               | n.a.                                    | n.a.                                     | n.a.  | n.a. |
| 51      | Hill            | 0.937                             | 104.000                  | 1.214                    | 153.500                  | 24.243<br>(23.343-25.159)               | 33.718                                   | 1.391            | Add               | 144.186<br>(136.209-154.157)            | 56.186                                   | 0.390 | Ant  |
| 52      | Hill            | 0.854                             | 26.730                   | 1.541                    | 28.760                   | 20.591<br>(19.818-21.435)               | 7.461                                    | 0.362            | Ant               | n.a.                                    | n.a.                                     | n.a.  | n.a. |
| 53      | Hill            | 0.854                             | 27.500                   | 3.056                    | 29.520                   | 24.579<br>(23.548-25.580)               | 7.464                                    | 0.304            | Ant               | n.a.                                    | n.a.                                     | n.a.  | n.a. |
| 54      | Hill            | 0.949                             | 38.810                   | 2.183                    | 29.230                   | 18.003<br>(17.692-18.318)               | 7.461                                    | 0.414            | Ant               | n.a.                                    | n.a.                                     | n.a.  | n.a. |
| 55      | Hill            | 0.983                             | 80.460                   | 3.242                    | 28.550                   | 15.633<br>(14.621-16.673)               | 14.320                                   | 0.916            | Add               | 33.266<br>(32.318-34.322)               | 21.797                                   | 0.655 | Add  |
| 56      | Hill            | 0.982                             | 69.140                   | 3.180                    | 35.610                   | 20.365<br>(20.205-20.527)               | 25.152                                   | 1.235            | Add               | 48.165<br>(47.158-49.422)               | 30.553                                   | 0.634 | Add  |
| 57      | Hill            | 0.941                             | 57.740                   | 4.158                    | 27.250                   | 18.708<br>(17.314-20.325)               | 17.387                                   | 0.929            | Add               | 42.665<br>(41.264-43.917)               | 24.010                                   | 0.563 | Add  |
| 58      | Hill            | 0.975                             | 52.540                   | 3.125                    | 45.800                   | 28.820<br>(28.535-29.111)               | 49.564                                   | 1.720            | Add               | 118.817<br>(114.443-124.002)            | 53.248                                   | 0.448 | Ant  |
| 59      | Hill            | 0.946                             | 74.345                   | 2.592                    | 21.443                   | 10.455<br>(9.725-11.201)                | 9.270                                    | 0.887            | Add               | 28.307<br>(27.406-29.423)               | 19.702                                   | 0.696 | Add  |
| 60      | Hill            | 0.912                             | 71.680                   | 2.205                    | 20.330                   | 8.905<br>(8.659-9.159)                  | 9.831                                    | 1.104            | Add               | 29.693<br>(29.212-30.174)               | 23.550                                   | 0.793 | Add  |
| 61      | Hill            | 0.962                             | 75.370                   | 8.756                    | 13.190                   | 10.645<br>(9.826-11.374)                | 9.840                                    | 0.924            | Add               | 14.253<br>(12.667-15.716)               | 23.571                                   | 1.654 | Add  |

| Mix No. | RM <sup>a</sup> | Concentration Addition (CA) model |               |              |               |                                                  |                                          |                  |                   |                                                  |                                          |       |      |
|---------|-----------------|-----------------------------------|---------------|--------------|---------------|--------------------------------------------------|------------------------------------------|------------------|-------------------|--------------------------------------------------|------------------------------------------|-------|------|
|         |                 | Parameter                         |               |              |               | <i>EC</i> <sub>50</sub> Ratio                    |                                          |                  |                   |                                                  |                                          |       |      |
|         |                 | <i>r</i> <sup>2</sup>             | b<br>$\alpha$ | c<br>$\beta$ | d<br>$\gamma$ | <i>EC</i> <sub>10</sub> Ratio                    |                                          |                  |                   | <i>EC</i> <sub>50</sub> Ratio                    |                                          |       |      |
|         |                 |                                   |               |              |               | Observed<br><i>EC</i> <sub>10</sub> <sup>b</sup> | Predicted<br>[ <i>EC</i> <sub>10</sub> ] | MDR <sup>a</sup> | Type <sup>b</sup> | Observed<br><i>EC</i> <sub>50</sub> <sup>b</sup> | Predicted<br>[ <i>EC</i> <sub>50</sub> ] | MDR   | Type |
| 62      | Hill            | 0.935                             | 42.360        | 25.09        | 12.110        | 11.553<br>(11.536-11.569)                        | 9.832                                    | 0.851            | Add               | n.a.                                             | n.a.                                     | n.a.  | n.a. |
| 63      | n.a.            | n.a.                              | n.a.          | n.a.         | n.a.          | n.a.                                             | n.a.                                     | n.a.             | Ant               | n.a.                                             | n.a.                                     | n.a.  | n.a. |
| 64      | Hill            | 0.866                             | 35.350        | 2.183        | 6.443         | 4.207<br>(4.076-4.345)                           | 9.801                                    | 2.330            | Ant               | n.a.                                             | n.a.                                     | n.a.  | n.a. |
| 65      | Hill            | 0.969                             | 28.220        | 0.987        | 10.490        | 5.716<br>(4.800-6.757)                           | 58.002                                   | 10.148           | Ant               | n.a.                                             | n.a.                                     | n.a.  | n.a. |
| 66      | Hill            | 0.996                             | 344.400       | 0.991        | 66.930        | 1.938<br>(1.877-1.998)                           | 19.634                                   | 10.129           | Ant               | 11.184<br>(11.133-11.239)                        | 19.634                                   | 1.755 | Add  |
| 67      | Hill            | 0.996                             | 1554          | 0.554        | 19190         | 2.149<br>(2.013-2.297)                           | 35.040                                   | 16.304           | Ant               | 41.174<br>(40.008-42.351)                        | 35.040                                   | 0.851 | Add  |
| 68      | Hill            | 0.988                             | 23130         | 0.588        | 1003000       | 1.900<br>(1.799-2.028)                           | 24.380                                   | 12.831           | Ant               | 29.447<br>(29.139-29.743)                        | 24.380                                   | 0.828 | Add  |
| 69      | Hill            | 0.939                             | 55.230        | 1.640        | 31.430        | 12.520<br>(11.733-13.351)                        | 64.091                                   | 5.119            | Ant               | 124.476<br>(114.416-138.130)                     | 64.091                                   | 0.515 | Add  |
| 70      | Hill            | 0.915                             | 143.600       | 1.576        | 12.540        | 2.420<br>(2.363-2.478)                           | 7.425                                    | 3.068            | Ant               | 8.425<br>(8.407-8.443)                           | 7.425                                    | 0.881 | Add  |
| 71      | Hill            | 0.831                             | 16.470        | 2.532        | 14.090        | 16.732<br>(14.475-19.843)                        | 30.486                                   | 1.822            | Add               | n.a.                                             | n.a.                                     | n.a.  | n.a. |
| 72      | Hill            | 0.919                             | 57.330        | 2.352        | 6.735         | 3.478<br>(3.411-3.545)                           | 9.713                                    | 2.792            | Ant               | 15.232<br>(13.924-17.410)                        | 9.713                                    | 0.638 | Add  |
| 73      | Hill            | 0.880                             | 23.060        | 1.575        | 12.420        | 10.478<br>(9.848-11.140)                         | 57.911                                   | 5.527            | Ant               | n.a.                                             | n.a.                                     | n.a.  | n.a. |
| 74      | Hill            | 0.984                             | 118.100       | 1.532        | 11.440        | 2.421<br>(2.367-2.474)                           | 19.545                                   | 8.074            | Ant               | 9.356<br>(9.252-9.462)                           | 19.545                                   | 2.089 | Syn  |
| 75      | Hill            | 0.999                             | 181.300       | 0.976        | 37.580        | 2.044<br>(1.992-2.097)                           | 34.954                                   | 17.104           | Ant               | 13.973<br>(13.628-14.327)                        | 34.954                                   | 2.502 | Syn  |
| 76      | Hill            | 0.999                             | 163.300       | 1.058        | 20.600        | 1.563<br>(1.532-1.594)                           | 24.294                                   | 15.547           | Ant               | 9.513<br>(9.412-9.616)                           | 24.294                                   | 2.554 | Syn  |
| 77      | Hill            | 0.976                             | 95.770        | 1.817        | 32.030        | 9.812<br>(9.286-10.362)                          | 64.002                                   | 6.523            | Ant               | 33.628<br>(32.793-34.476)                        | 64.002                                   | 1.903 | Add  |
| 78      | Hill            | 0.978                             | 95.710        | 2.284        | 3.216         | 1.256<br>(1.244-1.267)                           | 7.337                                    | 5.844            | Ant               | 3.345<br>(3.298-3.393)                           | 7.337                                    | 2.194 | Syn  |

| Mix No. | RM <sup>a</sup> | Concentration Addition (CA) model |                          |                         |                          |                                                                    |                                          |                  |                   |                                                                    |                                          |       |      |
|---------|-----------------|-----------------------------------|--------------------------|-------------------------|--------------------------|--------------------------------------------------------------------|------------------------------------------|------------------|-------------------|--------------------------------------------------------------------|------------------------------------------|-------|------|
|         |                 | Parameter                         |                          |                         |                          | <i>EC</i> <sub>10</sub> Ratio                                      |                                          |                  |                   | <i>EC</i> <sub>50</sub> Ratio                                      |                                          |       |      |
|         |                 | <i>r</i> <sup>2</sup>             | <sup>b</sup><br>$\alpha$ | <sup>c</sup><br>$\beta$ | <sup>d</sup><br>$\gamma$ | Observed<br><i>EC</i> <sub>10</sub><br>[ <i>EC</i> <sub>10</sub> ] | Predicted<br>[ <i>EC</i> <sub>10</sub> ] | MDR <sup>a</sup> | Type <sup>b</sup> | Observed<br><i>EC</i> <sub>50</sub><br>[ <i>EC</i> <sub>50</sub> ] | Predicted<br>[ <i>EC</i> <sub>50</sub> ] | MDR   | Type |
| 79      | Hill            | 0.864                             | 16.400                   | 2.562                   | 12.170                   | 14.486<br>(12.717-16.252)                                          | 30.536                                   | 2.108            | Ant               | n.a.                                                               | n.a.                                     | n.a.  | n.a. |
| 80      | Hill            | 0.962                             | 48.540                   | 1.747                   | 4.616                    | 2.132<br>(2.087-2.177)                                             | 9.761                                    | 4.577            | Ant               | n.a.                                                               | n.a.                                     | n.a.  | n.a. |
| 81      | Hill            | 0.911                             | 28.750                   | 1.648                   | 13.510                   | 9.225<br>(8.282-10.291)                                            | 57.961                                   | 6.283            | Ant               | n.a.                                                               | n.a.                                     | n.a.  | n.a. |
| 82      | Hill            | 0.984                             | 79.750                   | 1.490                   | 6.548                    | 1.779<br>(1.737-1.820)                                             | 19.593                                   | 11.014           | Ant               | 9.278<br>(9.091-9.535)                                             | 19.594                                   | 2.112 | Syn  |
| 83      | Hill            | 0.968                             | 71.520                   | 2.244                   | 14.780                   | 6.578<br>(6.375-6.785)                                             | 35.001                                   | 5.321            | Ant               | 21.523<br>(21.255-21.778)                                          | 35.001                                   | 1.626 | Add  |
| 84      | Hill            | 0.965                             | 82.150                   | 2.276                   | 11.330                   | 4.753<br>(4.644-4.866)                                             | 24.341                                   | 5.121            | Ant               | 13.751<br>(13.473-14.037)                                          | 24.341                                   | 1.770 | Add  |
| 85      | Hill            | 0.986                             | 53.860                   | 2.439                   | 24.910                   | 13.589<br>(12.727-14.490)                                          | 64.051                                   | 4.714            | Ant               | 71.179<br>(67.508-75.322)                                          | 64.051                                   | 0.900 | Add  |
| 86      | Hill            | 0.991                             | 90.590                   | 2.392                   | 3.643                    | 1.522<br>(1.496-1.579)                                             | 7.385                                    | 4.851            | Ant               | 3.974<br>(3.940-4.008)                                             | 7.385                                    | 1.858 | Add  |
| 87      | Hill            | 0.995                             | 68.500                   | 0.674                   | 13.490                   | 3.310<br>(3.179-3.441)                                             | 8.185                                    | 8.350            | Ant               | 59.022<br>(58.001-60.012)                                          | 44.894                                   | 0.761 | Add  |
| 88      | Hill            | 0.997                             | 94.160                   | 0.800                   | 15.740                   | 1.099<br>(1.011-1.189)                                             | 7.459                                    | 6.790            | Ant               | 18.379<br>(17.999-18.801)                                          | 54.143                                   | 2.946 | Syn  |
| 89      | Hill            | 0.994                             | 93.520                   | 1.661                   | 16.070                   | 4.476<br>(4.283-4.675)                                             | 7.446                                    | 7.089            | Ant               | 17.472<br>(17.091-17.854)                                          | 54.057                                   | 3.094 | Syn  |
| 90      | Hill            | 0.991                             | 83.580                   | 1.753                   | 20.150                   | 6.453<br>(6.286-6.628)                                             | 7.453                                    | 1.155            | Add               | 25.288<br>(24.877-25.699)                                          | 54.103                                   | 2.139 | Syn  |
| 91      | Hill            | 0.969                             | 82.010                   | 1.345                   | 23.220                   | 5.352<br>(5.064-5.652)                                             | 9.825                                    | 1.836            | Add               | 32.348<br>(31.968-32.745)                                          | 23.533                                   | 0.728 | Add  |
| 92      | Hill            | 0.935                             | 46.880                   | 1.336                   | 13.880                   | 5.223<br>(5.046-5.388)                                             | 9.787                                    | 1.874            | Add               | n.a.                                                               | n.a.                                     | n.a.  | n.a. |
| 93      | Hill            | 0.831                             | 16.470                   | 2.532                   | 11.020                   | 13.084<br>(11.319-15.516)                                          | 9.808                                    | 0.750            | Add               | n.a.                                                               | n.a.                                     | n.a.  | n.a. |

<sup>a</sup> Regression models; <sup>b</sup> Height; <sup>c</sup> Slope; <sup>d</sup> Center point; <sup>e</sup> MDR, model deviation ratio; <sup>f</sup> Antagonism; <sup>g</sup> Additivity <sup>h</sup> Synergism, and <sup>i</sup> Not available.

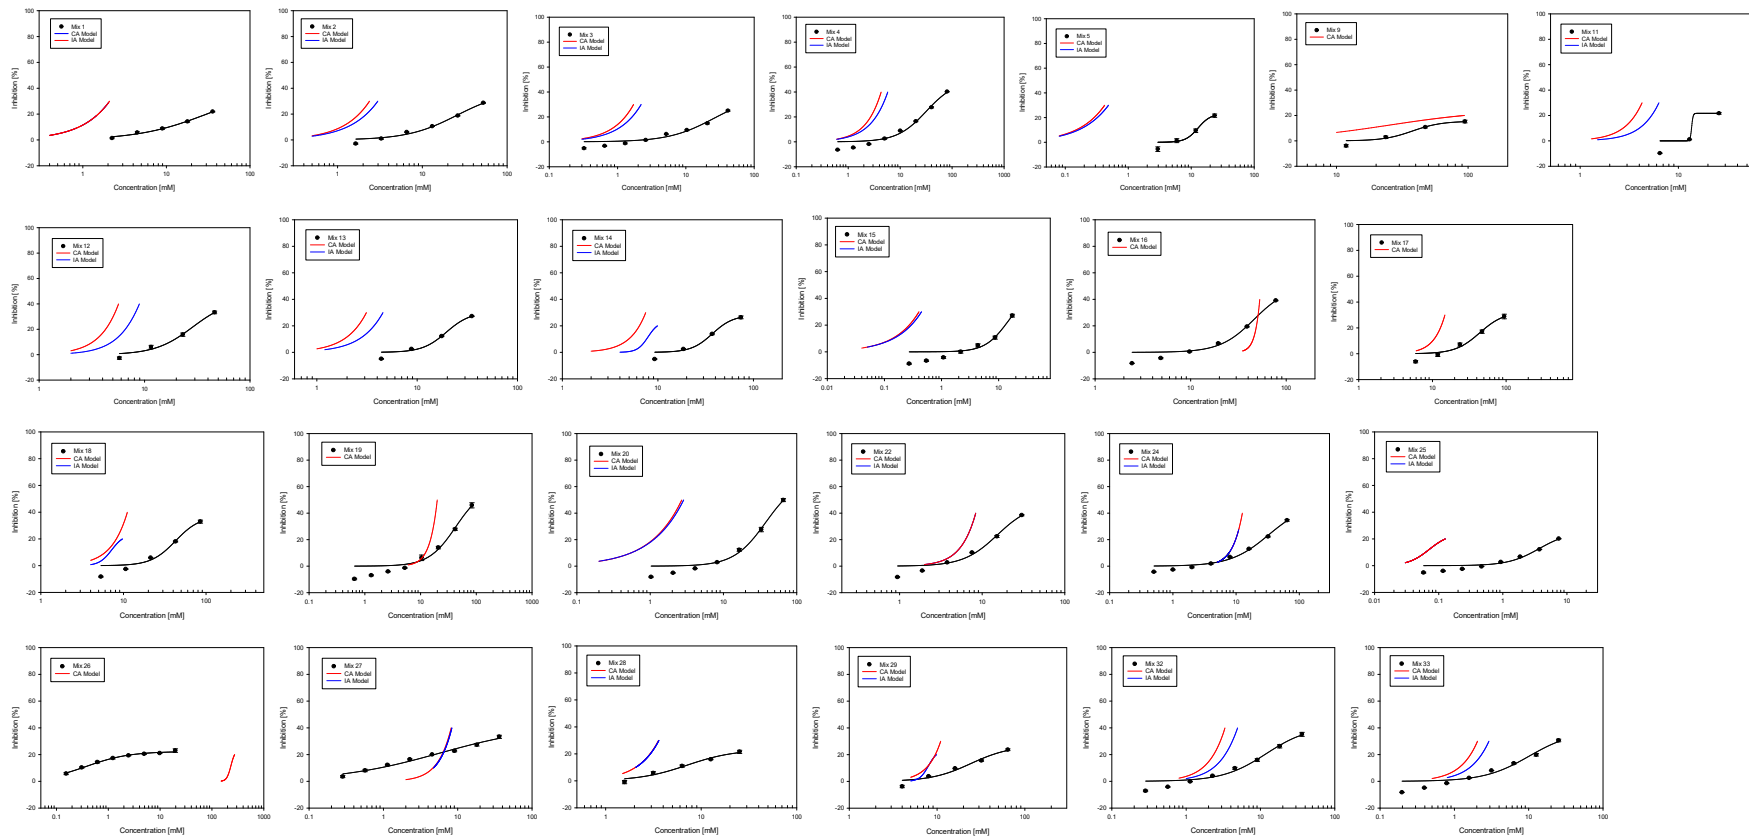

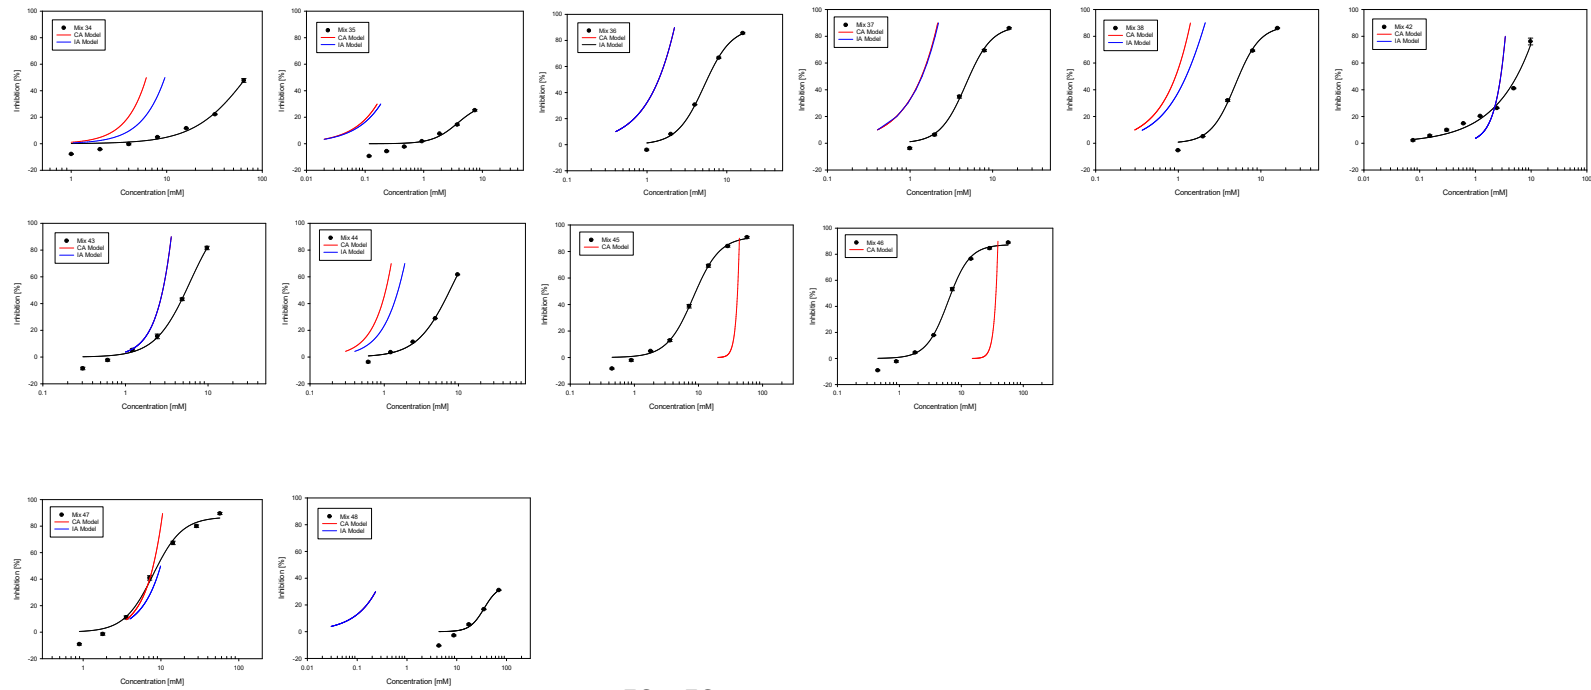

**Figure S1.** Comparison of dose-response curves at  $EC_{10}+EC_{10}$  mixture derived from observed data and predicted data by CA, IA models. (the data points are geometric means  $\pm$  standard deviation(SD) of observed data.)

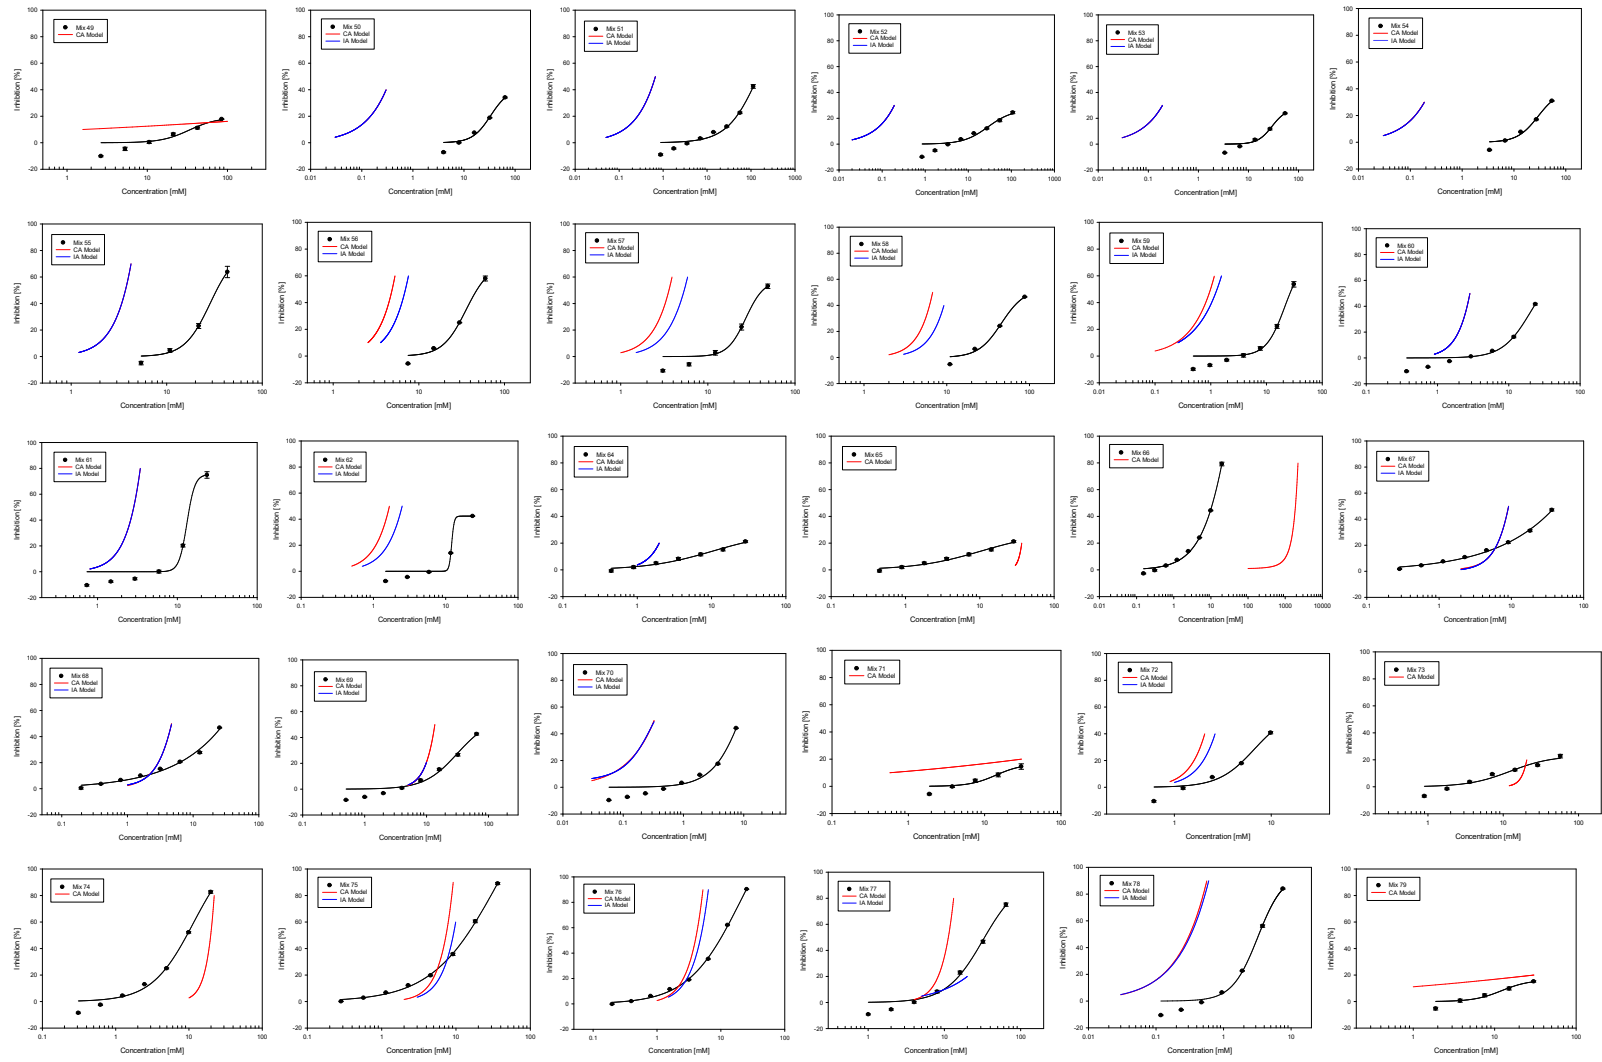



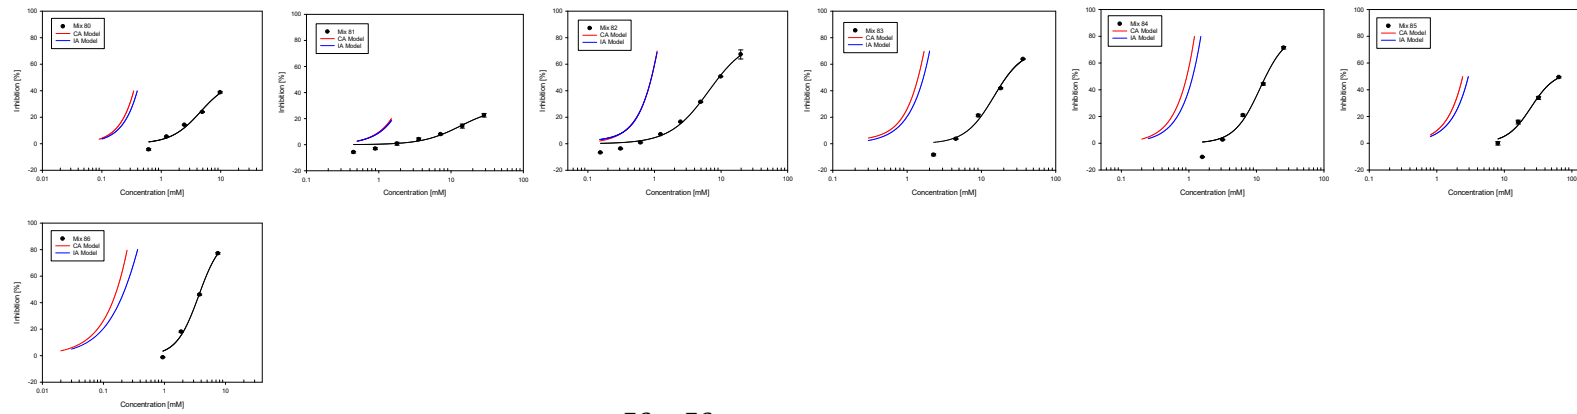

**Figure S2.** Comparison of dose-response curves at  $EC_{10}+EC_{50}$  mixture derived from observed data and predicted data by CA, IA models. (the data points are geometric means  $\pm$  standard deviation(SD) of observed data.)

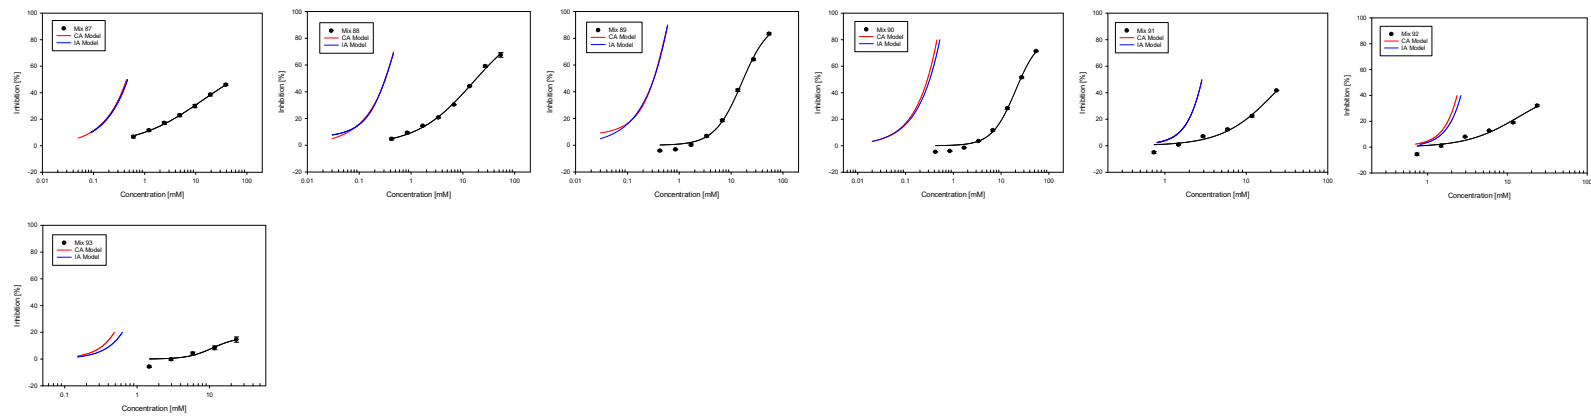

**Figure S3.** Comparison of dose-response curves at  $EC_{50}+EC_{50}$  mixture derived from observed data and predicted data by CA, IA models. (the data points are geometric means  $\pm$  standard deviation(SD) of observed data.)

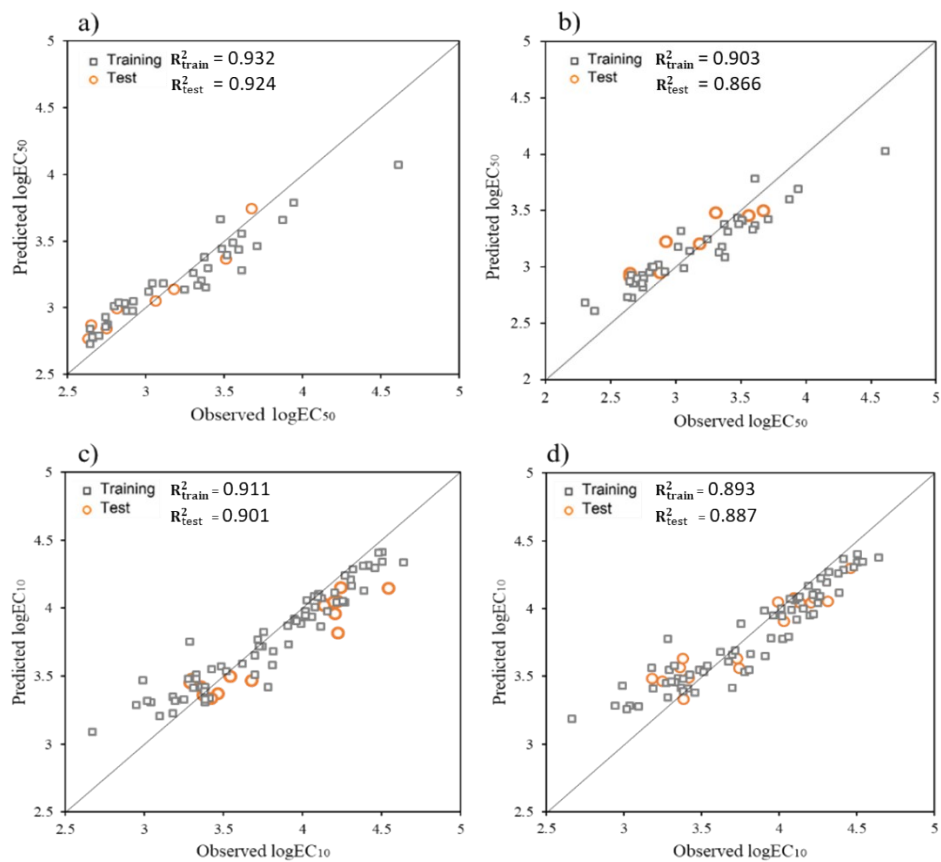

**Figure S4.** Observed-predicted plots of the RF-based models for predicting  $\log EC_{50}$  (Figures S4a and S4b) and  $\log EC_{10}$  (Figures S4c and S4d). All descriptor-based models (Figures S4a and S4c) and calculated descriptor-based models (Figures S4b and S4d).

**Table S5.** Y-randomization for RF-model (calculated descriptor-based) built from  $\log^{EC_{50}}$ 

| Iteration | Random forest model |                                                                                                                     |
|-----------|---------------------|---------------------------------------------------------------------------------------------------------------------|
|           | $R^2_{train(rand)}$ |                                                                                                                     |
| 1         | 0.8628              | $\bar{R}^2_{train(rand)} = 0.8655$<br>$R^2_{train(val)} = 0.903$<br>$\sigma_{rand} = 0.0018$<br>$Z_{score} = 15.66$ |
| 2         | 0.8633              |                                                                                                                     |
| 3         | 0.8643              |                                                                                                                     |
| 4         | 0.8648              |                                                                                                                     |
| 5         | 0.8650              |                                                                                                                     |
| 6         | 0.8653              |                                                                                                                     |
| 7         | 0.8671              |                                                                                                                     |
| 8         | 0.8674              |                                                                                                                     |
| 9         | 0.8677              |                                                                                                                     |
| 10        | 0.8679              |                                                                                                                     |

**Table S6.** Y-randomization for RF-model (calculated descriptor-based) built from  $\log^{EC}_{10}$ 

| Iteration | Random forest model |                                 |
|-----------|---------------------|---------------------------------|
|           | $R^2_{train(rand)}$ |                                 |
| 1         | 0.8750              |                                 |
| 2         | 0.8780              |                                 |
| 3         | 0.8792              | $R_{train(rand)}^{-2} = 0.8801$ |
| 4         | 0.8801              | $R_{train(val)}^2 = 0.893$      |
| 5         | 0.8804              | $\sigma_{rand} = 0.0020$        |
| 6         | 0.8812              | $Z_{score} = 6.31$              |
| 7         | 0.8815              |                                 |
| 8         | 0.8816              |                                 |
| 9         | 0.8818              |                                 |
| 10        | 0.8819              |                                 |
